# Supplementary material for: Pharmacometabolomics for predicting variable busulfan exposure in paediatric haematopoietic stem cell transplantation patients
Source: PubMed Central journal article supplement (PMC5431879; doi:10.1038/s41598-017-01861-7), 2017-05-10

## *Supplementary Information*

### **Pharmacometabolomics for predicting variable busulfan exposure in paediatric haematopoietic stem cell transplantation patients**

**Bora Kim<sup>1,\*</sup>, Ji Won Lee<sup>2,\*,#</sup>, Kyung Taek Hong<sup>2</sup>, Kyung-Sang Yu<sup>1</sup>, In-Jin Jang<sup>1</sup>, Kyung Duk Park<sup>2</sup>, Hee Young Shin<sup>2</sup>, Hyo Seop Ahn<sup>2</sup>, Joo-Youn Cho<sup>1</sup>, and Hyoung Jin Kang<sup>2</sup>**

<sup>1</sup>Department of Clinical Pharmacology and Therapeutics, Seoul National University College of Medicine and Hospital, Seoul, Korea; <sup>2</sup>Department of Pediatrics, Cancer Research Institute, Seoul National University College of Medicine and Hospital, Seoul, Korea.

\*These authors equally contributed to this work.

#Current affiliation: Department of Pediatrics, Samsung Medical Center, Sungkyunkwan University School of Medicine

#### **Corresponding Authors:**

Hyoungh Jin Kang, E-mail: [kanghj@snu.ac.kr](mailto:kanghj@snu.ac.kr) Phone: (82)2-2072-3304, Fax: (82)2-743-3455

Joo-Youn Cho, E-mail: [joocho@snu.ac.kr](mailto:joocho@snu.ac.kr) Phone: (82)2-2072-3625, Fax: (82)2-743-3455

## *Supplementary Figures*

Supplementary Figure S1. **(A)** Deferoxamine structure and its mass fragmentation. **(B)** MS/MS spectra of urinary deferoxamine (upper) and authentic deferoxamine (lower). The fragments and relative intensities of 16 urinary metabolites were compared with the fragmentation pattern of authentic deferoxamine.

**A**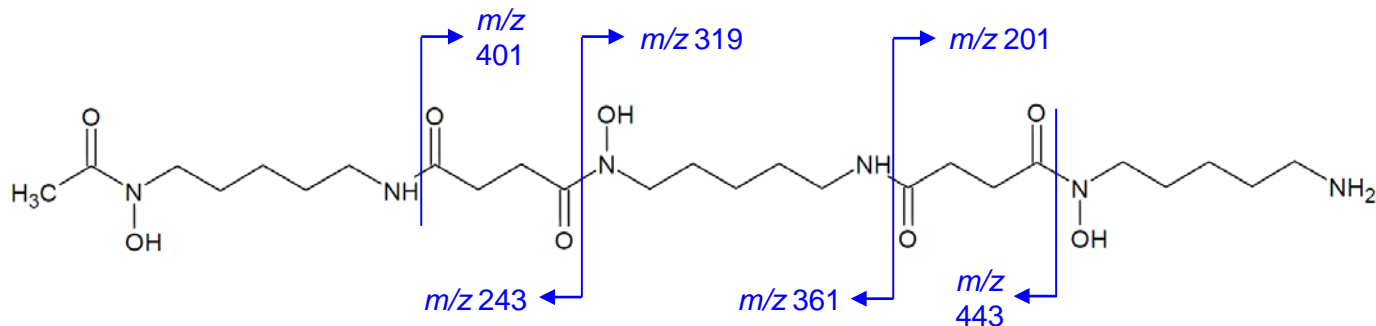**B**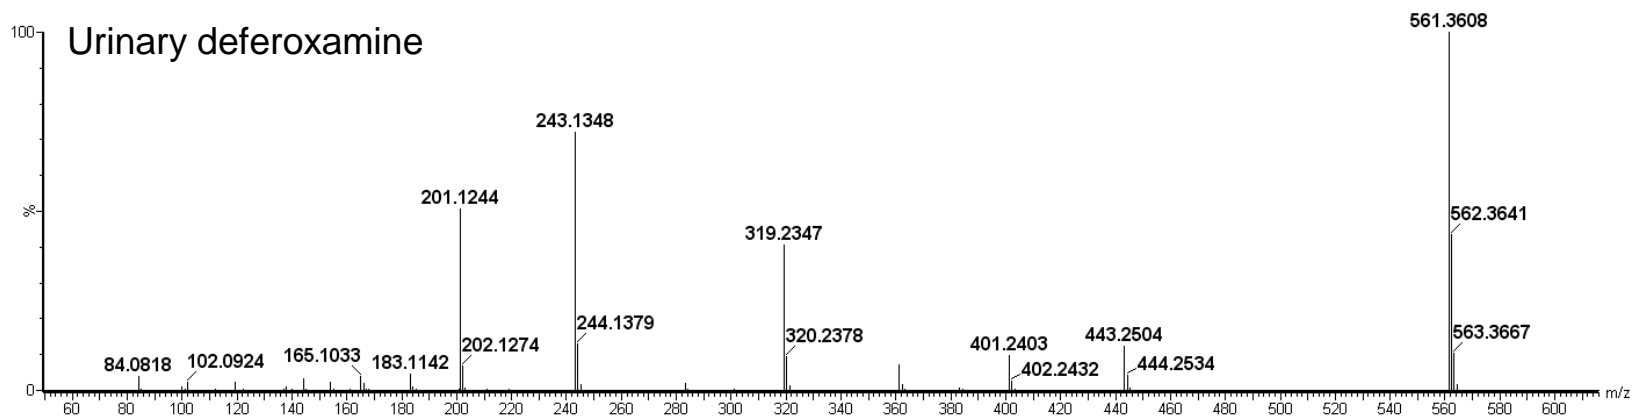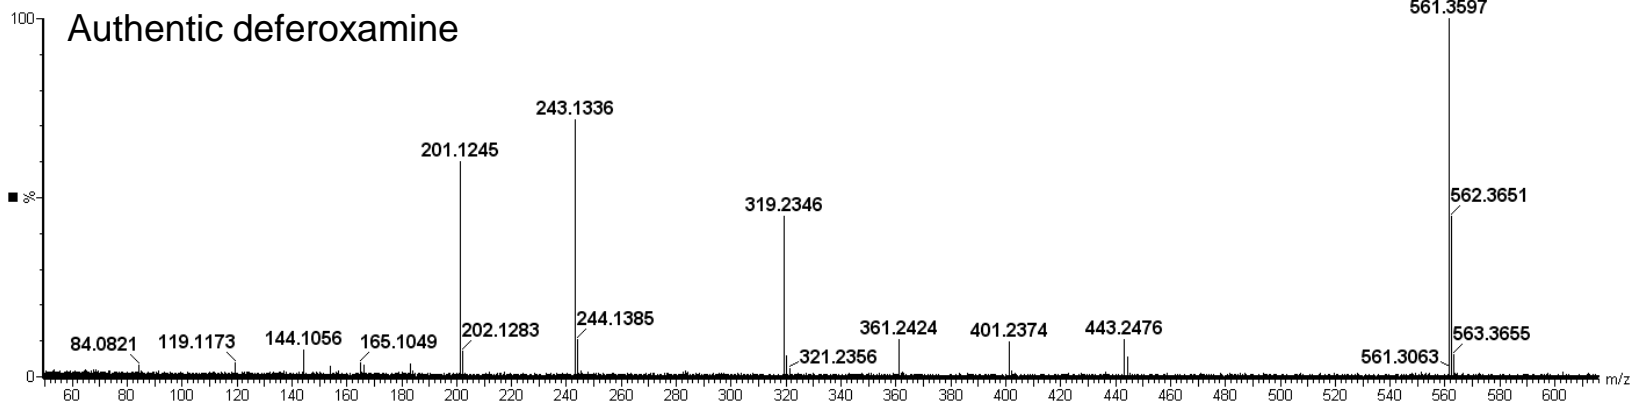

Supplementary Figure S2. The fragments of urinary C9:1 carnitine was compared with authentic C8:0 carnitine. MS/MS spectra and each structure of C9:1 carnitine and C8:0 carnitine.

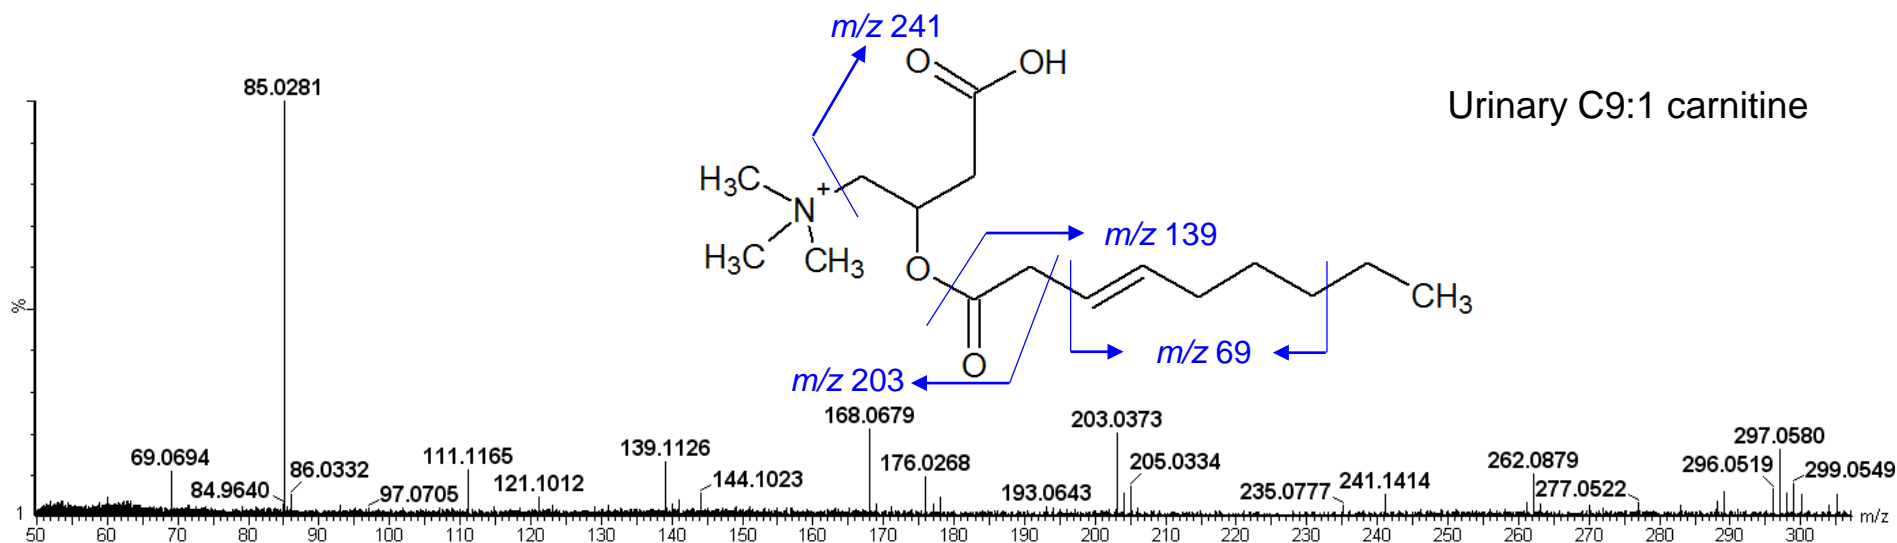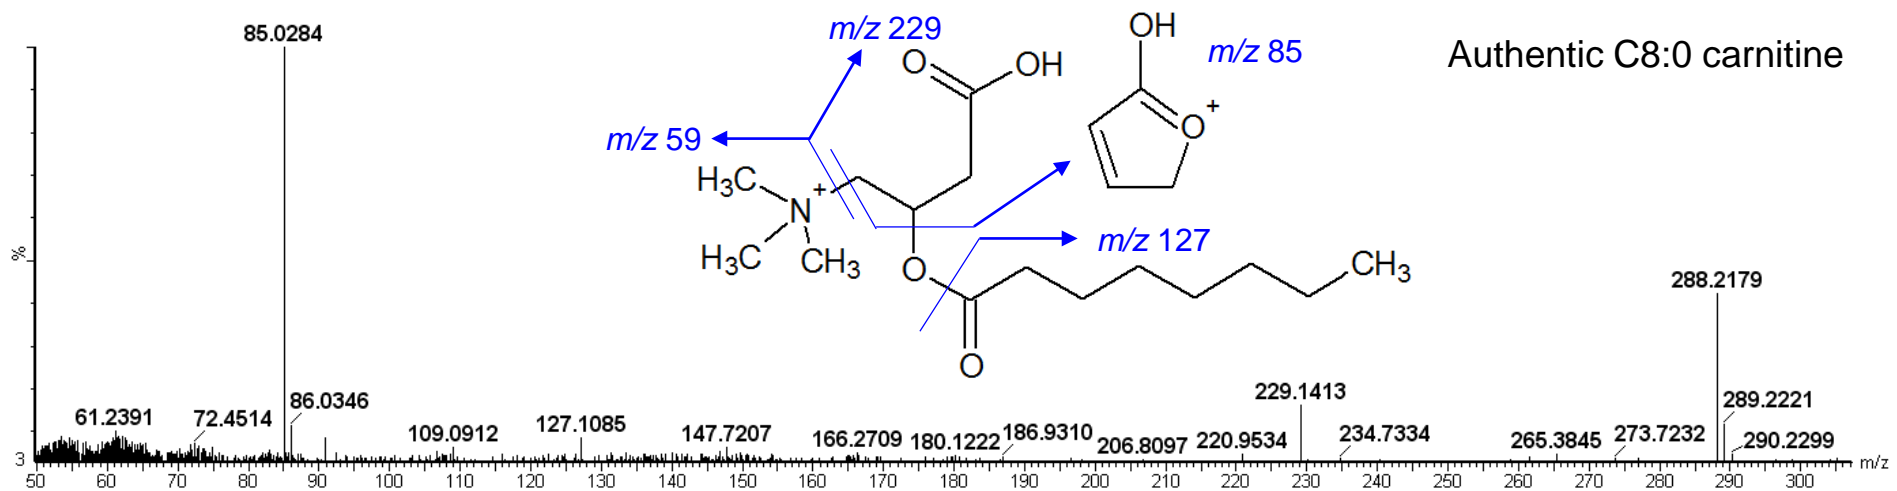

Supplementary Figure S3. The fragments of urinary C12:1-OH carnitine was compared with authentic C10:0 carnitine. MS/MS spectra and each structure of C12:1-OH carnitine and C10:0 carnitine.

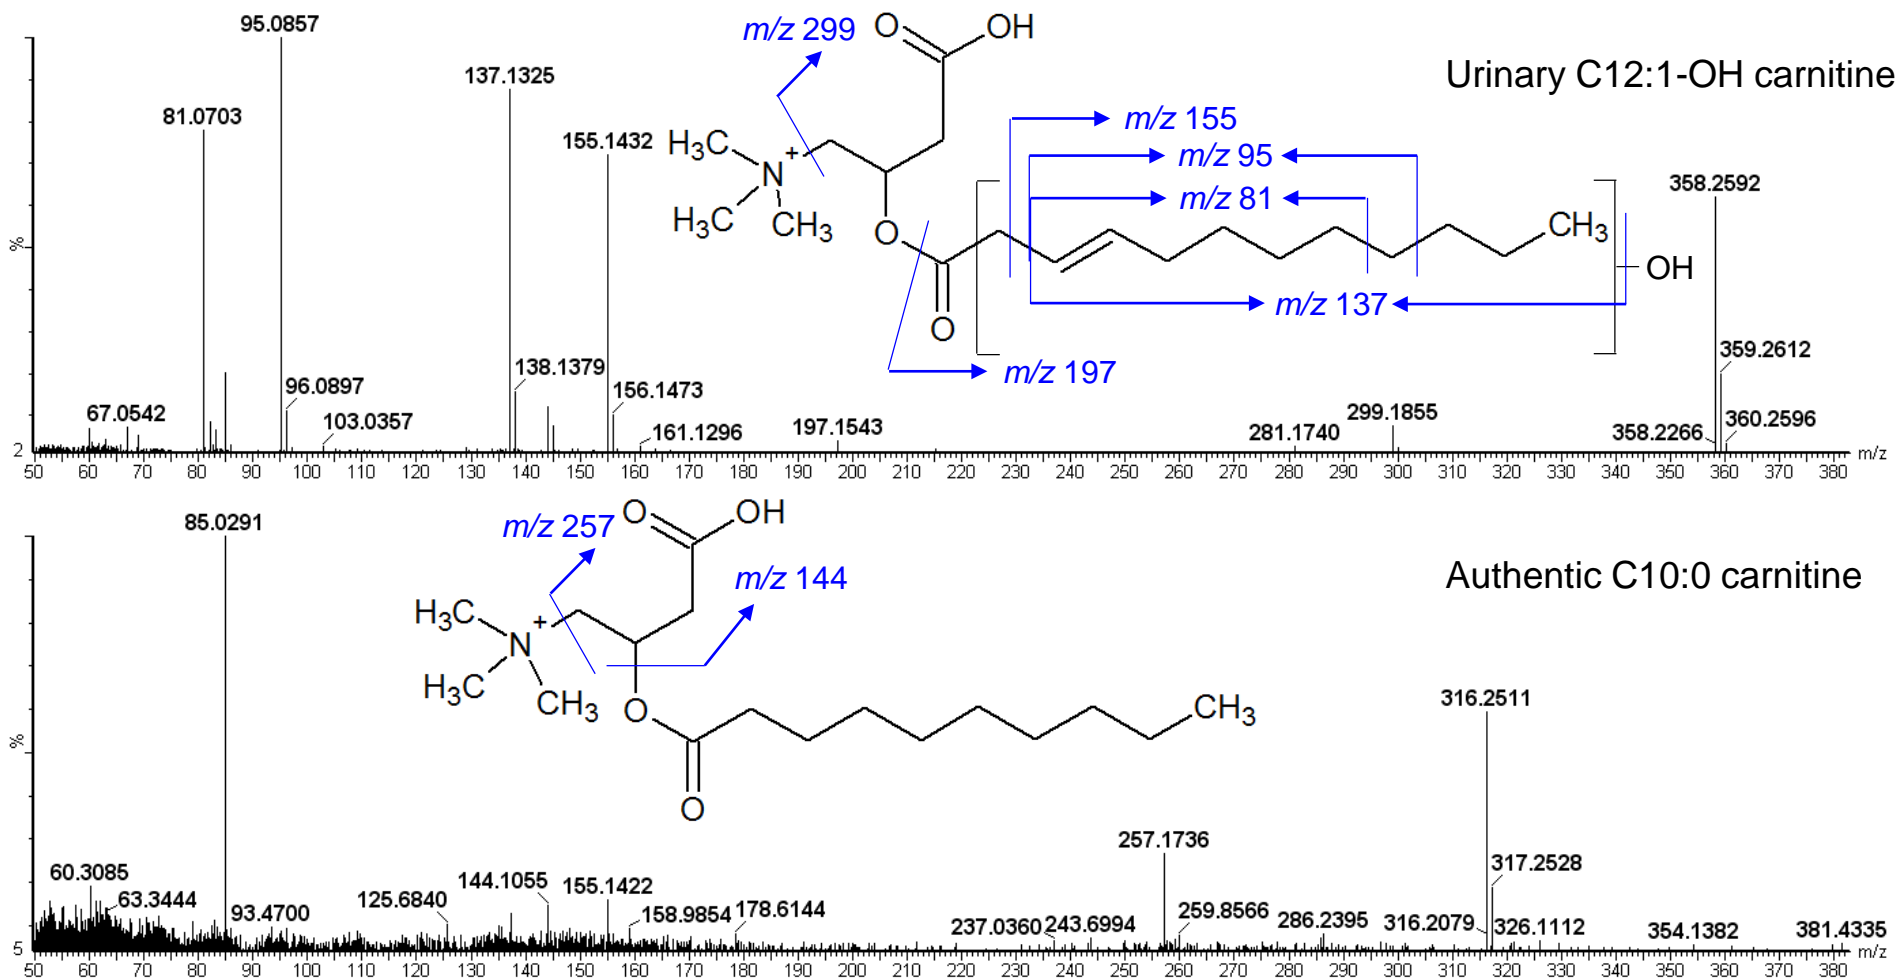

Supplementary Figure S4. Phenylacetylglutamine structure and MS/MS spectra of urinary PAGN, [M-H]<sup>-</sup> adduct, [2M+Na-2H]<sup>-</sup> adduct, and authentic PAGN.

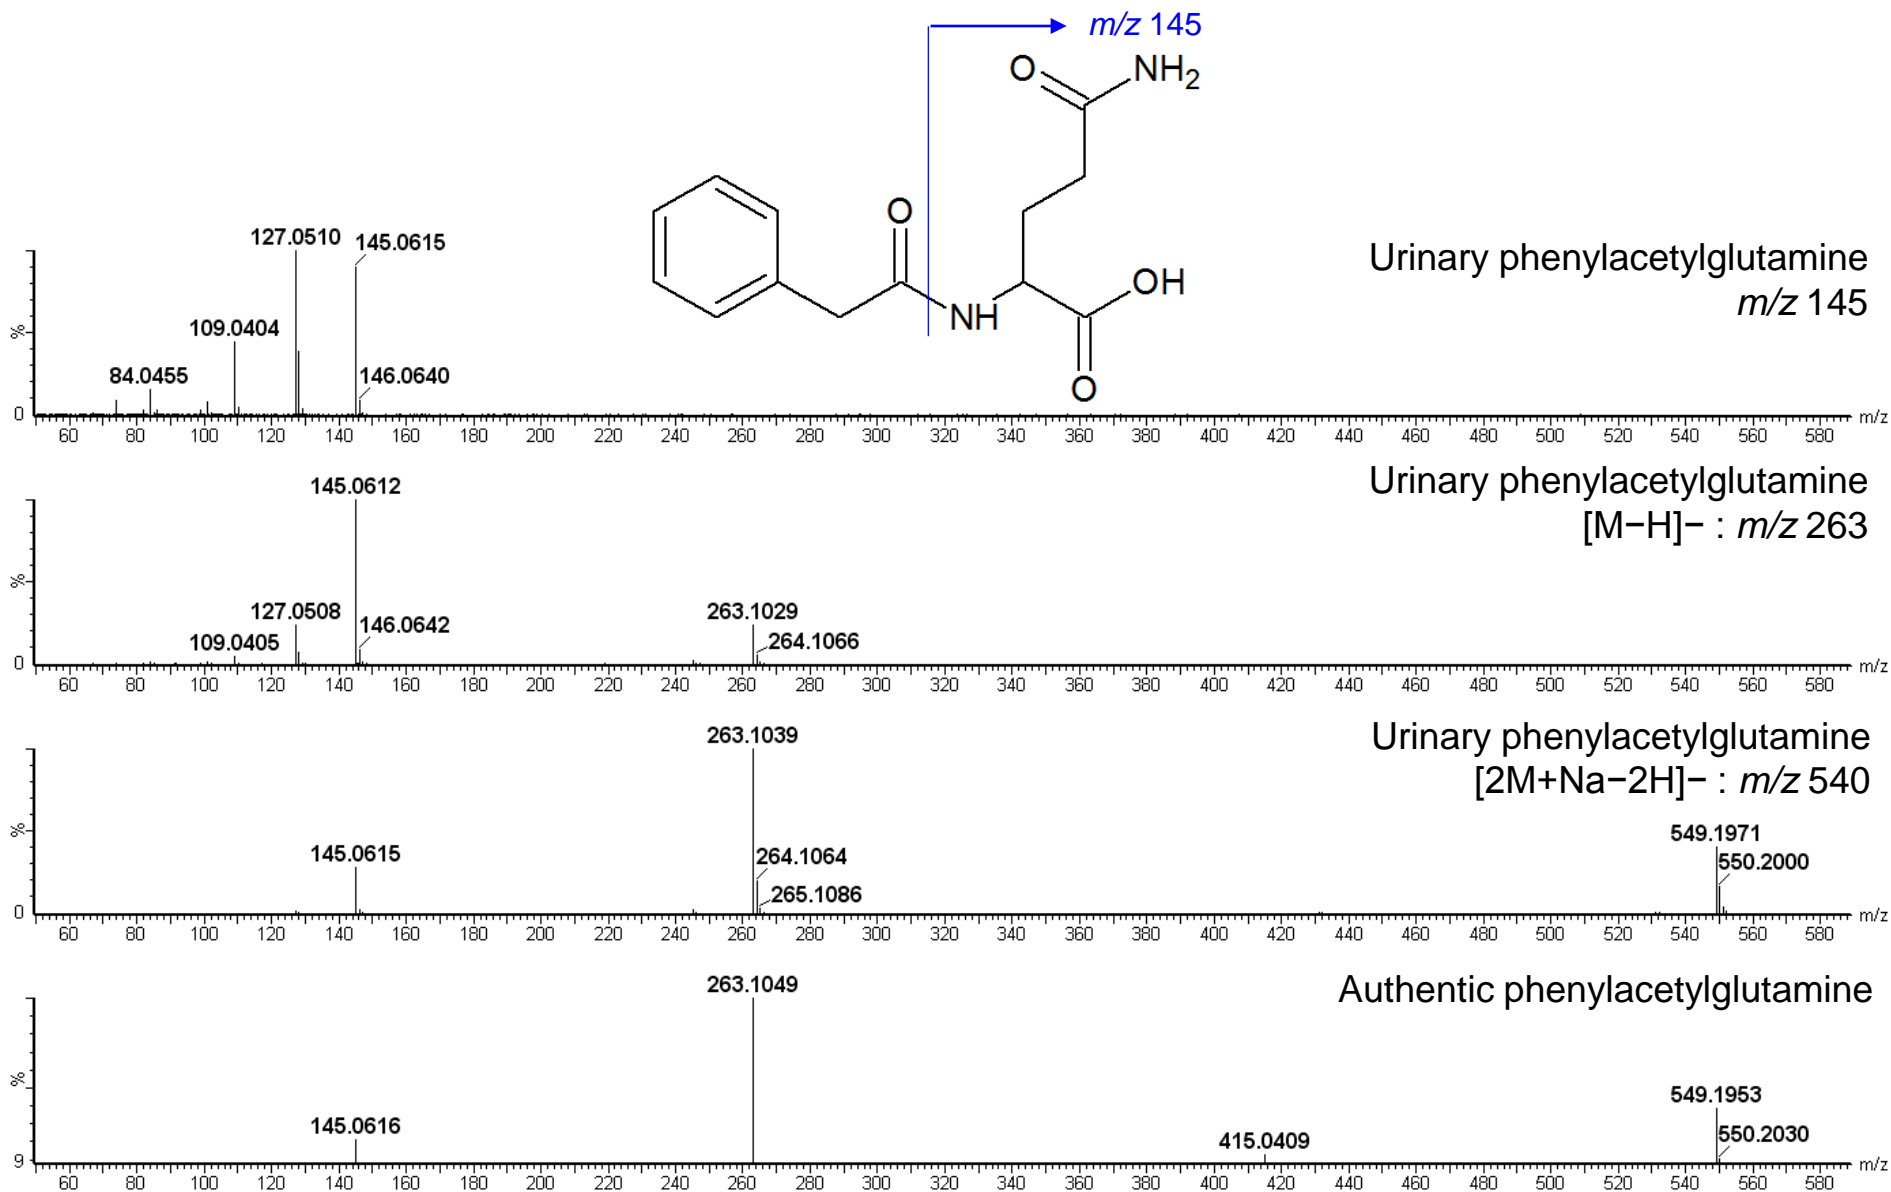

Supplement: 41598_2017_1861_MOESM1_ESM.pdf [file 41598_2017_1861_MOESM1_ESM.pdf]
